# Supplementary material
Source: publisher site journal article supplement (https://www.dovepress.com/article/459867)
Supplement: Supplementary file 1 [file get_supplementary_file.php]

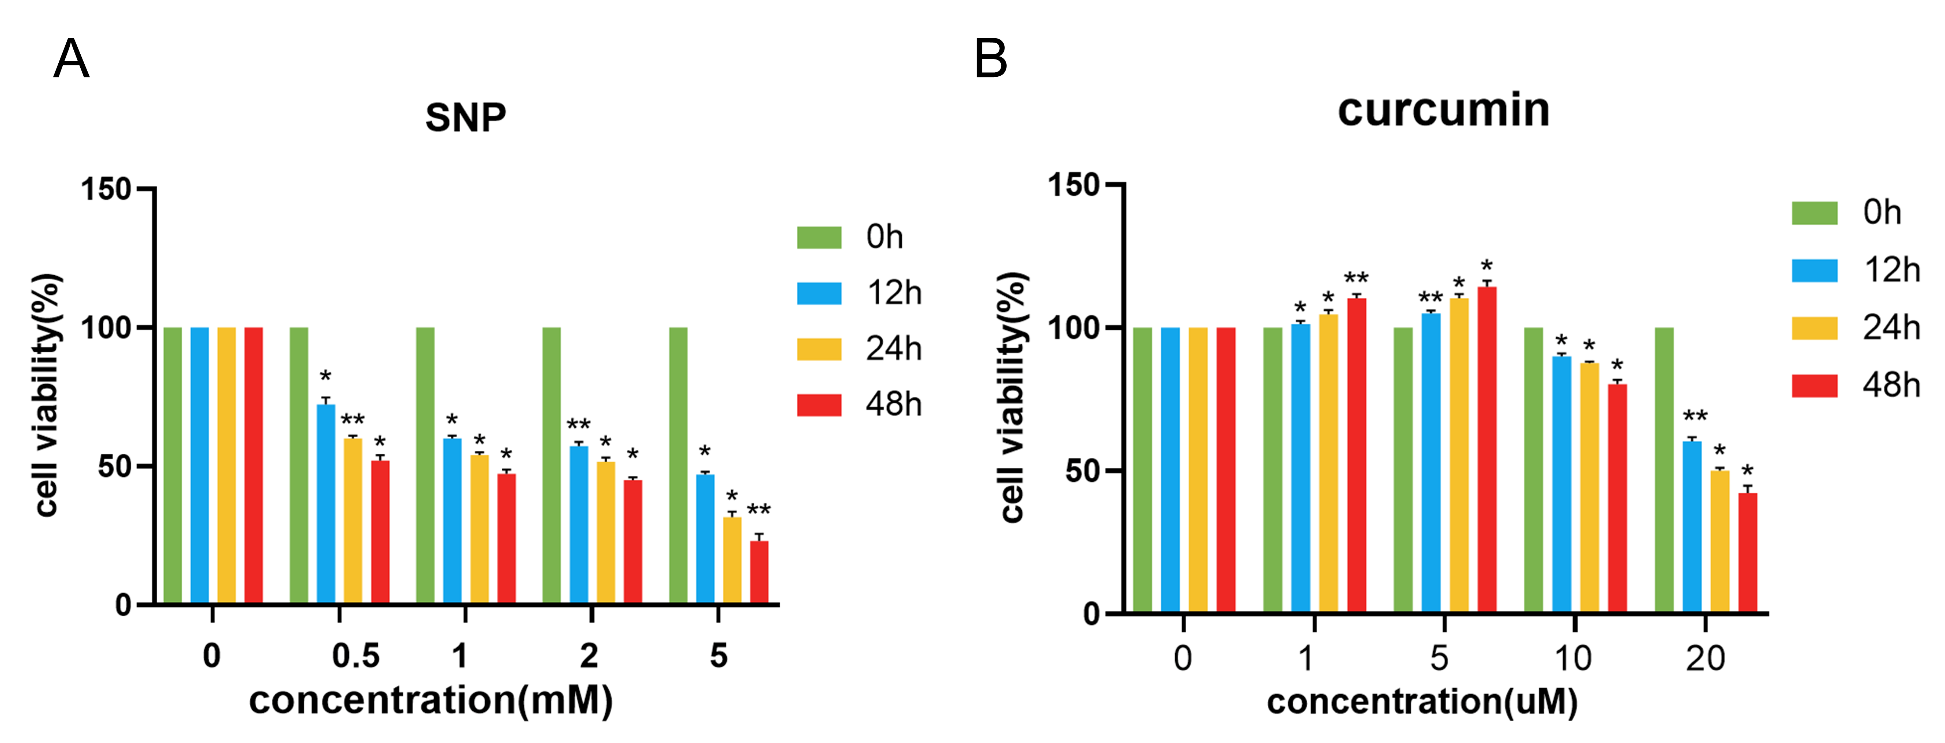


Supplementary Figure 1 Effects of SNP and curcumin on chondrocyte viability. (A) Effect of different concentrations of SNP on chondrocyte viability values. (B) Effect of different concentrations of curcumin on chondrocyte viability values.**p* < 0.05, ***p* < 0.01.


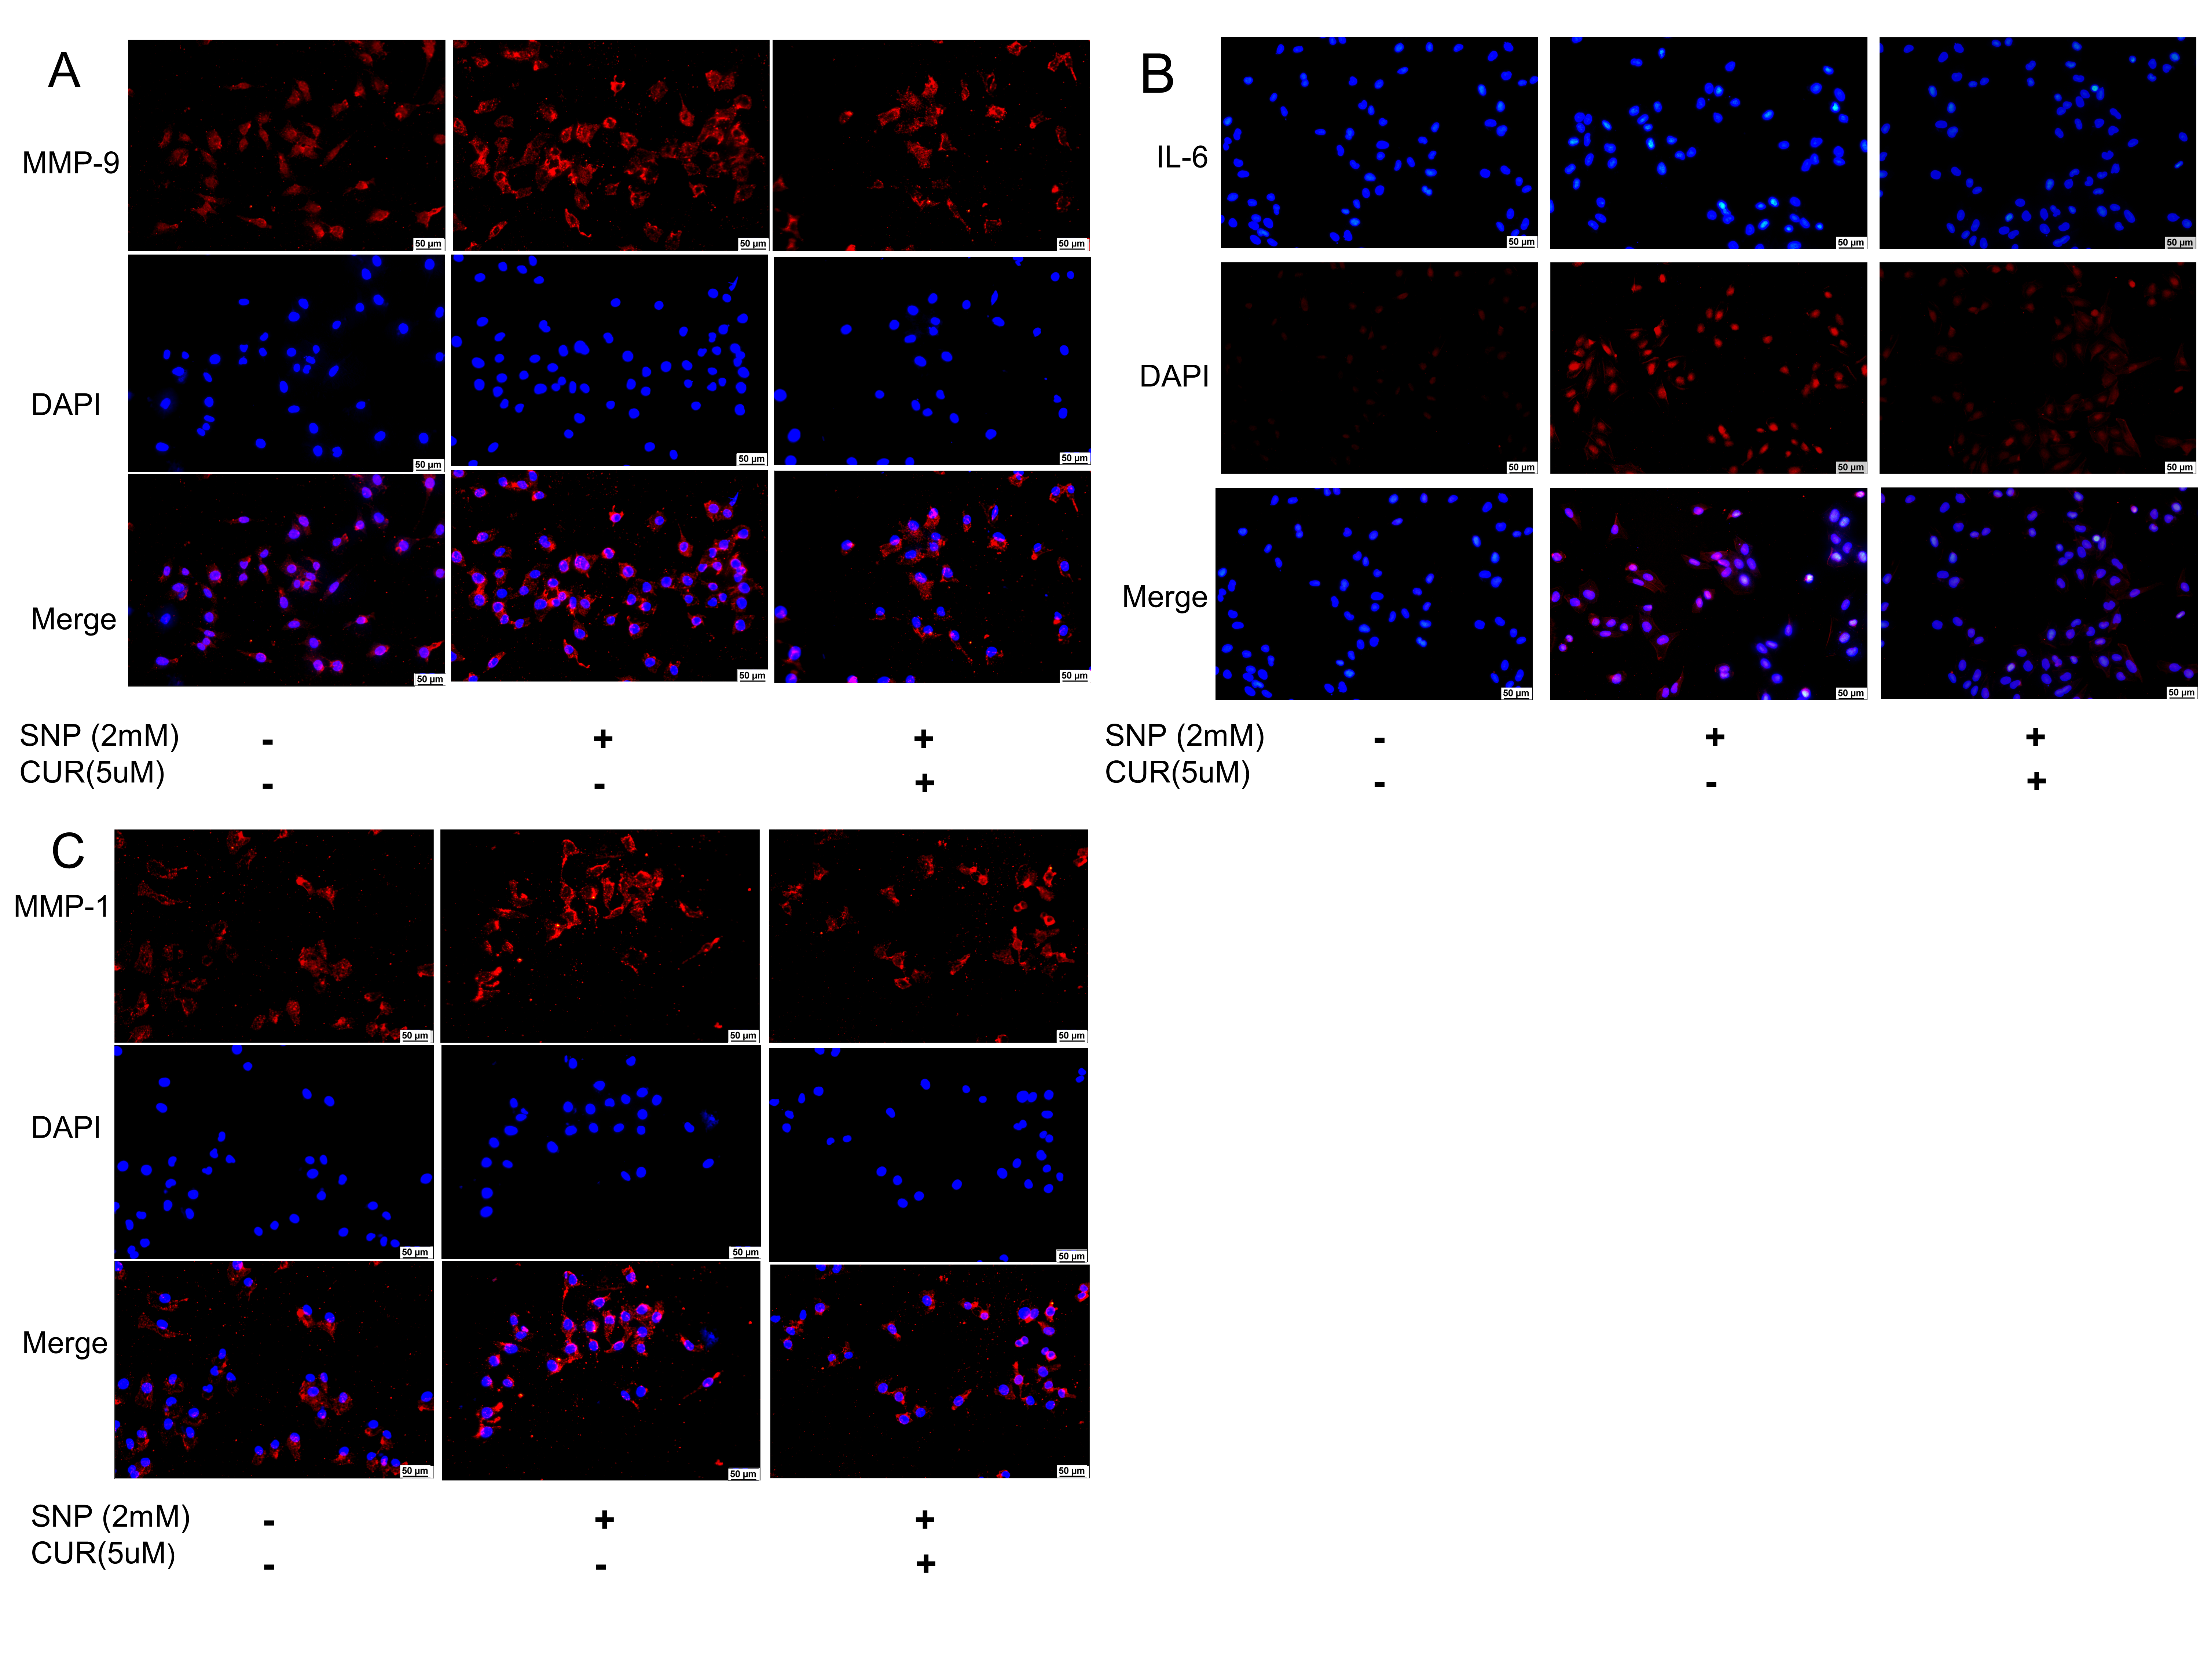


Supplementary Figure 2 Immunofluorescence raw images of chondrocyte inflammation and matrix degradation. (A-C) Effects of curcumin on MMP-9, IL-6, and MMP-1 in SNP-induced chondrocytes (scale, 50 µM).
